# Supplementary material for: Single-cell and bulk RNA sequencing data jointly reveals VDAC2’s impacts on prognosis and immune landscape of NSCLC
Source: publisher site journal article supplement (doi:10.18632/aging.205517), 2024-02-20
Supplement: Supplementary file [file aging-v16i4-205517-supplementary-material-SD1.pdf]

SUPPLEMENTARY FIGURES

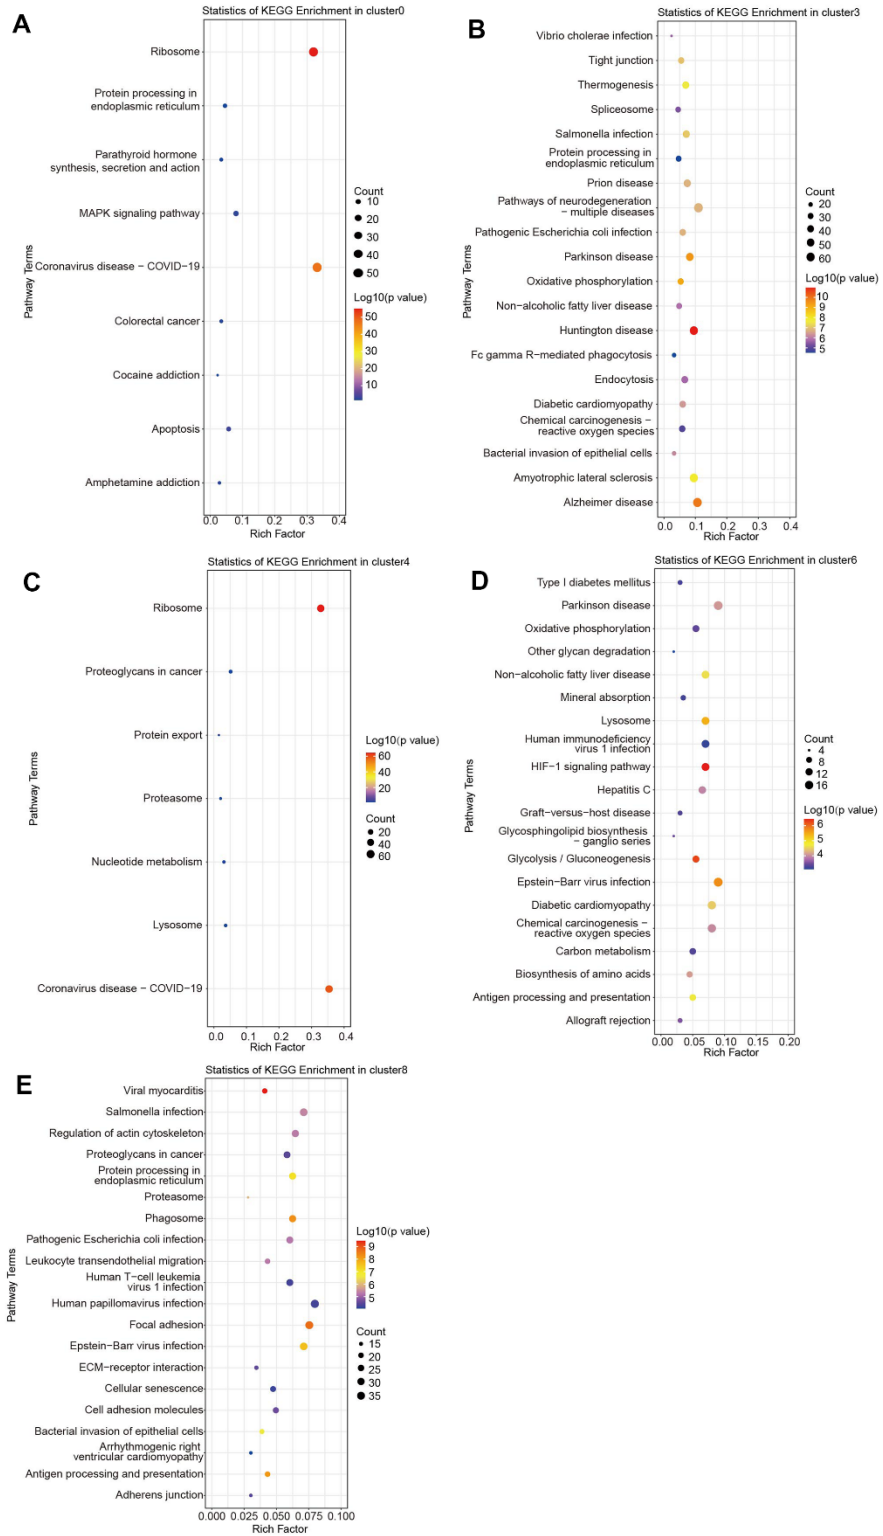

Supplementary Figure 1. The results of KEGG enriched analysis in cluster0 (A), cluster3 (B), cluster4 (C), cluster6 (D) and cluster8 (E).

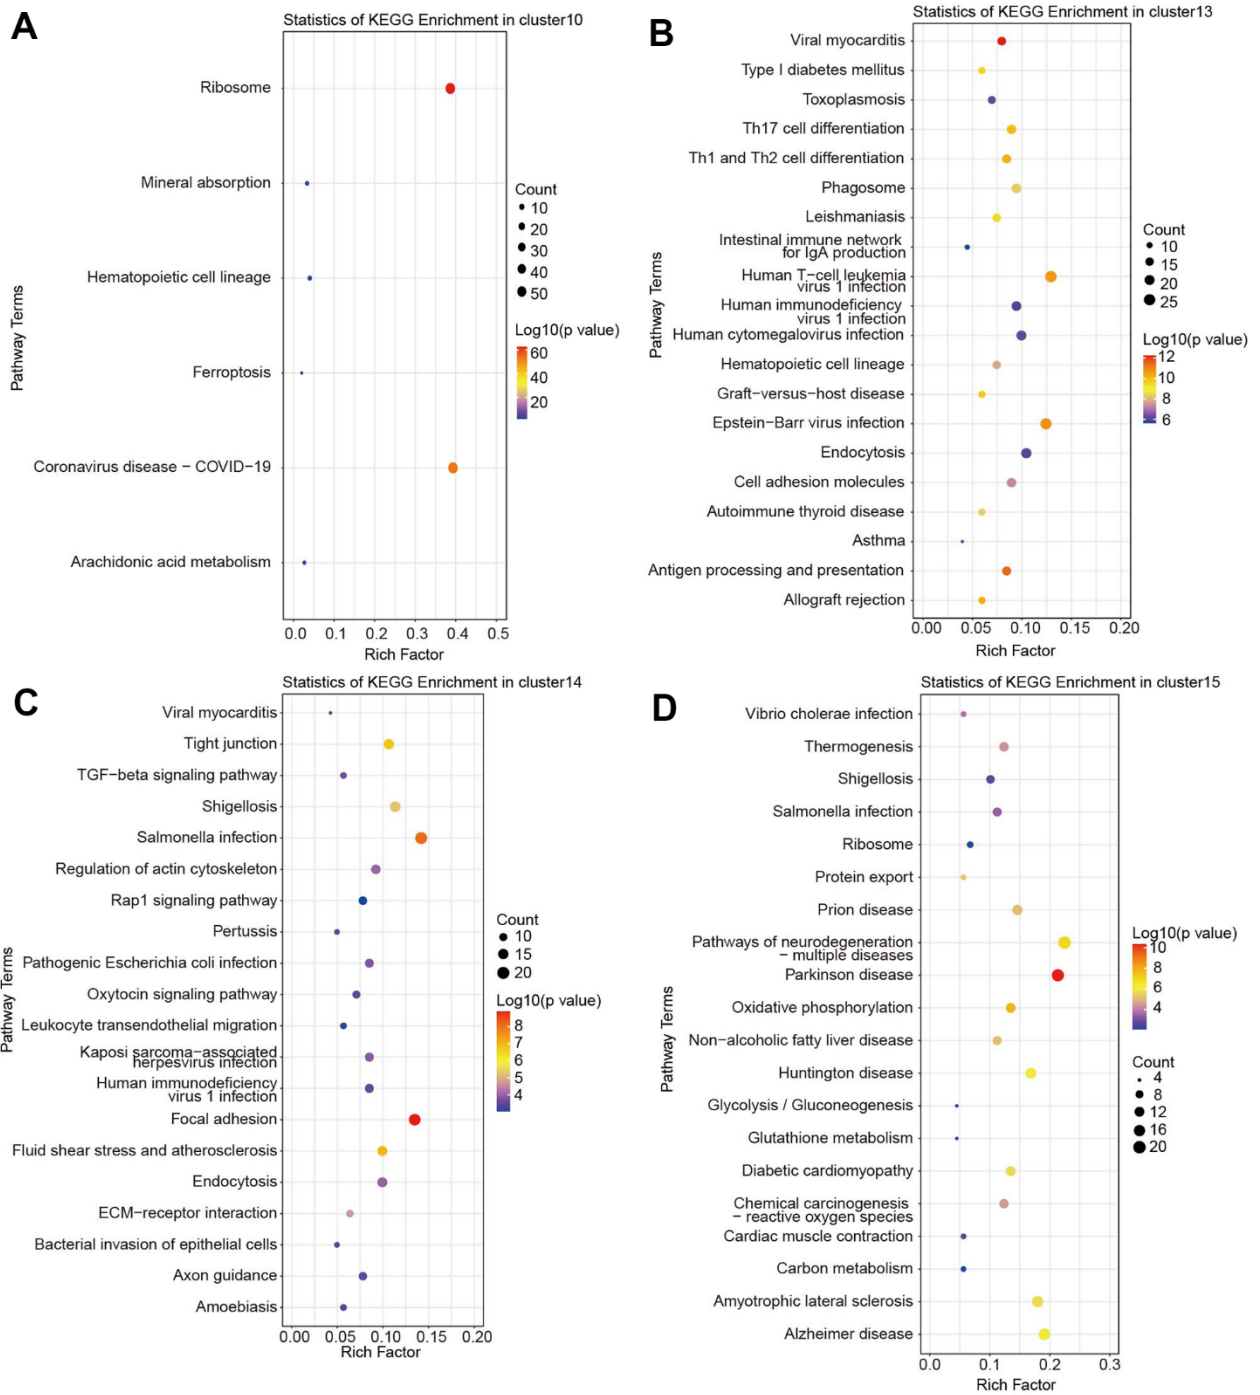

**Supplementary Figure 2.** The results of KEGG enriched analysis in cluster10 (A), cluster13 (B), cluster14 (C) and cluster15 (D).

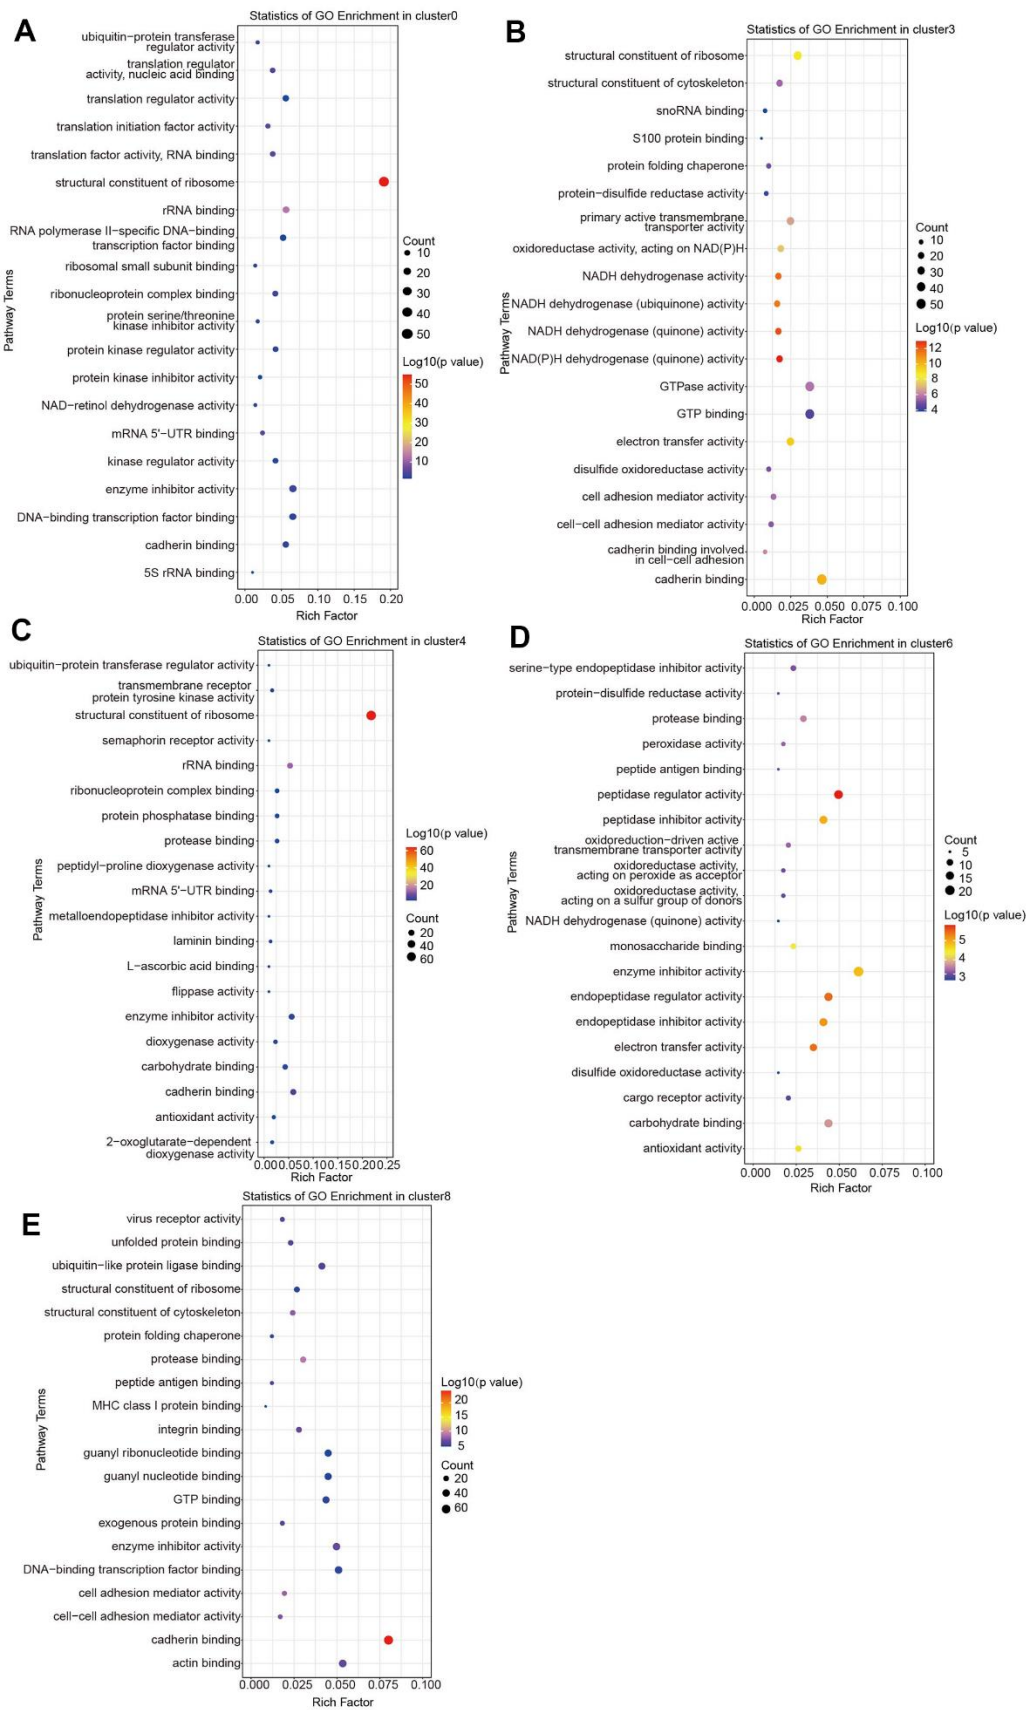

**Supplementary Figure 3.** The results of GO enriched analysis in cluster0 (A), cluster3 (B), cluster4 (C), cluster6 (D) and cluster8 (E).

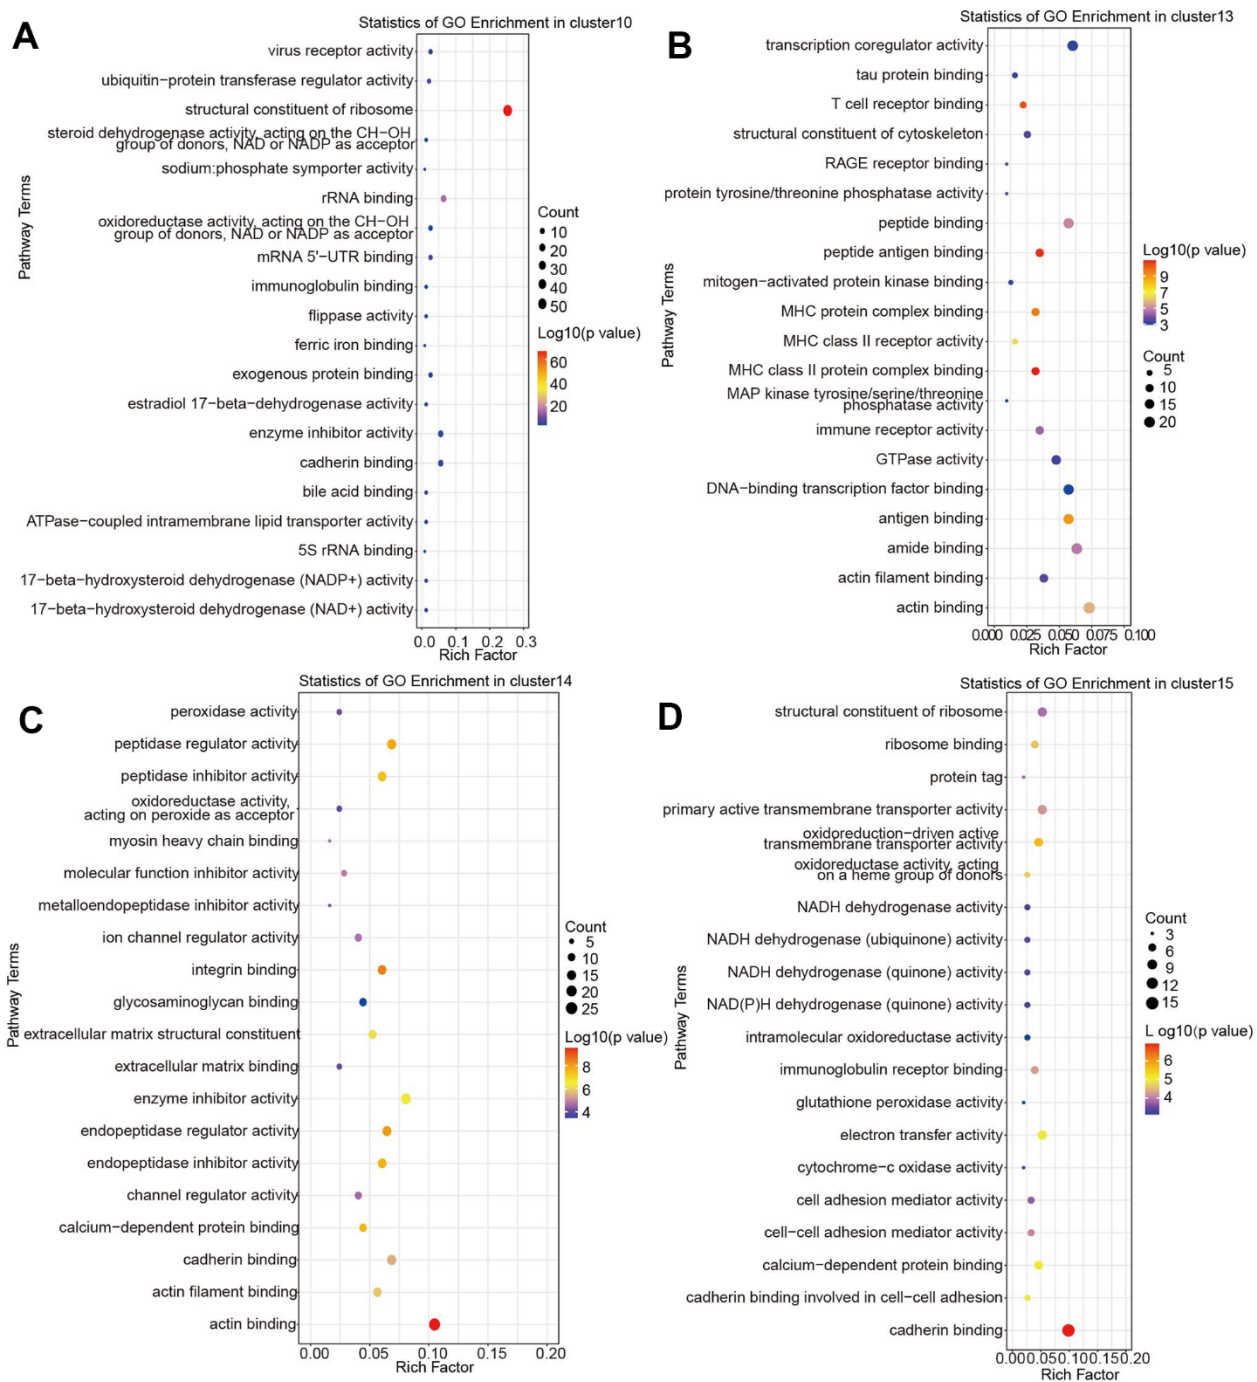

**Supplementary Figure 4.** The results of GO enriched analysis in cluster10 (A), cluster13 (B), cluster14 (C) and cluster15 (D).

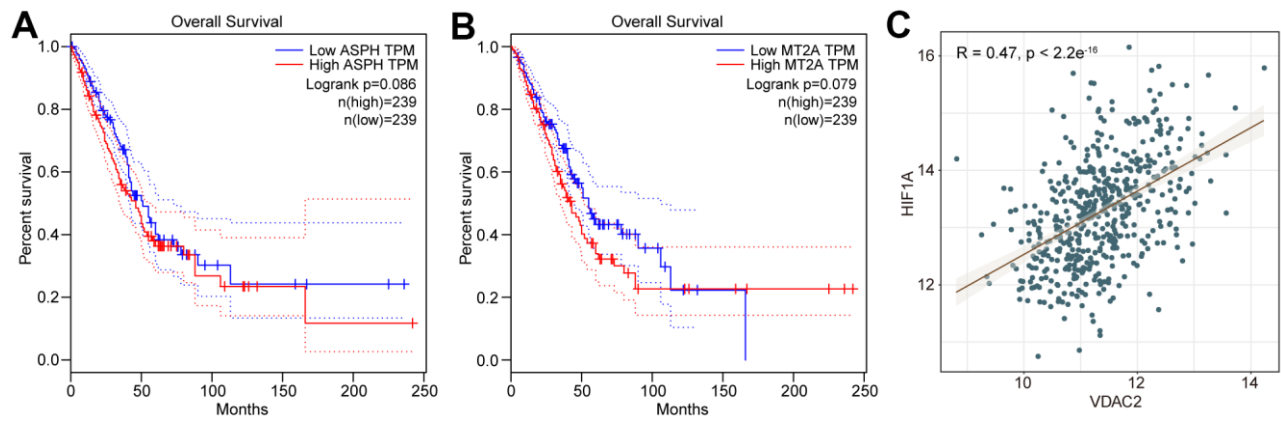

**Supplementary Figure 5.** The overall survival rate of patients with high or low *ASPH* (A) and *MT2A* (B) expression. (C) The correlation between *VDAC2* expression and hypoxia-inducible factor 1- $\alpha$  (HIF-1 $\alpha$ ).
